# Supplementary material for: Drosophila chem mutations disrupt epithelial polarity in Drosophila embryos
Source: PeerJ. 2016 Dec 1;4:e2731. doi: 10.7717/peerj.2731 (PMC5136136; doi:10.7717/peerj.2731)
Supplement: Data S1 [file peerj-04-2731-s001.xlsx]

## Sheet: Hoja1
			Intensidad relativa de la marca de coracle
			en células de la glándula salivar AREA 12.53micras ( St 16)
			yw	chem 1	chem 3	chem 5
			165.15	395.043	107.894	167.548
			199.781	290.862	235.998	123.497
			232.919	403.166	298.768	181.284
			191.183	297.137	284.876	118.609
			140.504	375.824	182.263	135.524
			233.992	391.531	144.314	141.307
			263.912	255.609	374.137	91.306
			168.746	374.824	253.805	79.613
			179.525	229.685	165.795	93.221
			206.911	263.165	137.275	93.955
			280.433	341.191	252.271	76.517
			126.621	248.848	278.238	130.253
			280.644	229.66	235.945	225.708
			146.773	275.225	206.611	129.069
			346.043	204.752	152.617	163.611
			147.629	381.732	83.406	125.87
			188.273	239.616	91.973	100.835
			165.045	289.52	87.06	143.589
			184.269	477.354	107.969	99.387
			141.894	213.495	323.15	631.781
			168.471	286.855	211.433	353.037
			131.209	304.393	247.611	908.379
			186.848	215.215	254.728	758.951
			125.237	172.895	432.903	761.536
			119.951	128.952	533.649	721.903
			195.046	156.096	260.219	671.138
			143.644	152.534	278.582	531.698
			194.921	171.478	376.336	823.361
			103.728	286.655	503.898	803.956
			133.982	212.719	457.982	520.875
			564.99	150.711	190.591	924.857
			740.058	167.662	270.637	553.938
			585.818	276.465	479.194	495.634
			609.869	187.207	301.761	340.677
			669.148	215.717	412.889	438.533
			591.25	290.287	258.919	454.287
			573.999	372.807	203.141	347.702
			505.338	277.387	217.596	658.314
			547.938	364.566	187.534	448.476
			711.752	459.509	112.004	855.932
			647.793	354.249	169.021	331.253
			636.002	312.961	157.864	547.324
			523.075	307.103	117.609	660.353
			829.402	271.859	85.009	627.746
			476.351	328.314	157.453	765.443
			495.234	189.842	109.414	455.934
			587.435	240.926	212.278	456.19
			706.989	284.208	102.819	538.051
			665.444	371.517	143.141	242.787
			597.311	337.693	115.197	427.387
			148.652	270.913	162.657	420.017
			173.226	513.897	141.785	424.244
			151.197	395.101	110.767	478.716
			144.784	334.788	123.786	552.721
			54.4	277.987	196.285	276.592
			119.479	307.652	214.951	230.196
			208.979	490.907	125.87	138.648
			101.016	393.273	131.042	171.906
			121.774	247.242	213.25	101.636
			136.072	347.921	174.91	168.854
			63.098	319.643	261.845	153.273
			132.401	244.988	104.109	158.775
			103.364	216.149	185.439	177.883
			123.719	256.601	81.786	125.704
			116.097	276.954	165.272	158.281
			171.289	261.839	89.947	252.091
			164.355	143.947	166.934	213.581
			85.532	277.501	145.356	178.203
			138.55	179.617	132.643	170.063
			79.593	373.901	137.884	171.708
			110.489	241.539	181.151	909.476
			42.659	197.091	183.455	807.065
			85.676	315.197	196.349	471.916
			72.26	210.182	134.818	766.668
			115.23	182.113	194.42	729.859
			81.066	300.816	166.64	600.24
			99.021	183.135	400.406	334.658
			142.975	277.915	384.103	228.398
			176.355	331.409	425.633	317.781
			95.661	218.185	251.218	243.985
			85.365	165.414	545.771	300.08
			84.295	166.484	399.764	292.302
			62.1	213.414	273.033	475.426
			73.013	146.084	375.21	443.532
			64.609	217.332	316.106	465.263
			75.828	211.813	377.831	355.572
			217.685	186.192	377.136	320.113
			211.383	258.699	317.276	443.896
			204.755	178.4	242.579	253.43
			226.236	244.052	403.324	398.286
			136.564	193.845	490.754	419.025
			146.676	264.721	272.102	329.528
			111.273	258.355	413.917	381.16
			189.905	95.314	312.991	331.926
			183.713	256.921	106.643	592.392
			190.266	312.315	120.396	691.396
			183.885	251.079	160.707	503.704
			611.875	278.777	116.314	430.563
			811.812		99.31	451.722
			855.057		131.067	390.894
			631.461		162.663	201.448
			472.269			215.22
			712.697
			677.694
			673.942
			592.934
			474.311
			677.883
			465.188
			688.793
			744.818
			552.471
			714.497
			349.758
			487.353
			826.079
			513.116
			645.322
			661.615
			490.846
			548.25
			967.419
			684.041
			326.874
			492.508
			748.814
			466.964
			358.47
			494.995
			386.323
			399.617
		Mean	335.7	270.6	229.4	385.3
		Std. Deviation	243.5	83.34	116.7	230.8
		Std. Error	21.28	8.418	11.62	22.86
			Tinción coracle estadio 16 mutantes chem
			yw	chem 1	chem 3	chem 5
			14586.5	17013.2	7052.77	10444.6
			16164.4	4012.22	11291.8	19701
			14556.4	4556.66	5932.28	17318.4
			10709.1	13938.8	5483.22	21929.2
			15827.6	2958.76	9685.8	11446.1
			15594.7	11294	8440.74	6443.55
			6454.96	14172.3	5806.61	6155.65
			15627.2	2288.95	7423.38	12817.2
					4066.01	13324.7
		Mean	13690	8779	7243	13287
		Std. Deviation	3399	5933	2259	5494
		Std. Error	1202	2098	753.1	1831
