# Supplementary material for: Drosophila chem mutations disrupt epithelial polarity in Drosophila embryos
Source: PeerJ. 2016 Dec 1;4:e2731. doi: 10.7717/peerj.2731 (PMC5136136; doi:10.7717/peerj.2731)
Supplement: Data S2 [file peerj-04-2731-s002.xlsx]

## Sheet: Hoja1
		chem1 vs yurt3					chem3 vs yurt3					chem1 vs coracle2					chem1 vs crumbs1					CODIGOS DE FENOTIPOS				CLONES ovoD																Mutantes chem
		chem 1	1	12			chem3	1	21			chem 1	1	0			chem 1	1	0			1	CUTICULE FRAG			chem1 M/Z	1	764			chem3M/Z	1	541			chem5M/Z	1	62					Early	Dorsal open	Head involution	Wild type	Larvae	TOTAL
		chem 1	2	39			chem3	2	103			chem 1	2	12			chem 1	2	12			2	EARLY			chem1 M/Z	2	25			chem3M/Z	2	2			chem5M/Z	2	40				chem1 /TM3, GFP	78	144	308	98	1544	2172
		chem 1	3	87			chem3	3	8			chem 1	3	39			chem 1	3	39			3	DORSAL OPEN			chem1 M/Z	3	21			chem3M/Z	3	1			chem5M/Z	3	11				chem2 /TM3, GFP	24	128	135	61	486	834
		chem 1	4	18			chem3	4	1			chem 1	4	87			chem 1	4	87			4	HEAT INVOL			chem1 M/Z	4	24			chem3M/Z	4	0			chem5M/Z	4	30				chem3 /TM3, GFP	99	439	134	50	381	1103
		chem 1	5	332			chem3	5	36			chem 1	5	18			chem 1	5	18			5	WT			chem1 M/+	1	162			chem3M/+	1	70			chem5M/+	1	21				chem4 /TM3, GFP	13	35	305	19	362	734
		chem 1	1	20			chem3	1	15			chem 1	6	332			chem 1	6	332			6	LARVAE			chem1 M/+	2	14			chem3M/+	2	3			chem5M/+	2	15				chem5 /TM3, GFP	65	69	247	38	478	897
		chem 1	2	30			chem3	2	98			chem 1	1	0			chem 1	1	0							chem1 M/+	3	7			chem3M/+	3	0			chem5M/+	3	7				chem6 /TM3, GFP	18	22	59	18	581	698
		chem 1	3	64			chem3	3	6			chem 1	2	20			chem 1	2	20							chem1 M/+	4	172			chem3M/+	4	2			chem5M/+	4	121
		chem 1	4	22			chem3	4	2			chem 1	3	30			chem 1	3	30
		chem 1	5	350			chem3	5	2			chem 1	4	64			chem 1	4	64			1	EARLY																			Heteroalelicas mutantes chem
		chem 1	1	11			chem3	1	33			chem 1	5	22			chem 1	5	22			2	DORSAL OPEN			Heteroalelicas CLONES ovoD
		chem 1	2	19			chem3	2	126			chem 1	6	350			chem 1	6	350			3	HEAT INVOL																				Early	Dorsal open	Head involution	Wild type	TOTAL
		chem 1	3	97			chem3	3	107			chem 1	1	0			chem 1	1	0			4	WT			chem1-3M/Z	1	885			chem1-5M/Z	1	204			chem3-5M/Z	1	192				chem 1 / chem 3	37	9	23	45	114
		chem 1	4	30			chem3	4	43			chem 1	2	11			chem 1	2	11			5	LARVAE			chem1-3M/Z	2	17			chem1-5M/Z	2	6			chem3-5M/Z	2	23				chem 1 / chem 5	57	37	25	39	158
		chem 1	5	297			chem3	5	339			chem 1	3	19			chem 1	3	19							chem1-3M/Z	3	13			chem1-5M/Z	3	2			chem3-5M/Z	3	14				chem 3 / chem 5	33	14	20	33	100
		chem 1	1	35			chem3	1	30			chem 1	4	97			chem 1	4	97							chem1-3M/Z	4	1			chem1-5M/Z	4	1			chem3-5M/Z	4	2
		chem 1	2	56			chem3	2	112			chem 1	5	30			chem 1	5	30							chem1M/+	1	85			chem1M/+	1	31			chem3M/+	1	23
		chem 1	3	60			chem3	3	13			chem 1	6	297			chem 1	6	297			1	EARLY			chem1M/+	2	7			chem1M/+	2	0			chem3M/+	2	6				STAGE Mutantes chem
		chem 1	4	28			chem3	4	4			chem 1	1	0			chem 1	1	0			2	DORSAL OPEN			chem1M/+	3	11			chem1M/+	3	1			chem3M/+	3	1
		chem 1	5	565			chem3	5	3			chem 1	2	35			chem 1	2	35			3	HEAT INVOL			chem1M/+	4	6			chem1M/+	4	2			chem3M/+	4	8					LARVAE	PUPAE	FLY
		yurt3	1	2			yurt3	1	2			chem 1	3	56			chem 1	3	56			4	WT																			chem1	240	0	0
		yurt3	2	116			yurt3	2	116			chem 1	4	60			chem 1	4	60																							chem3	108	52	80
		yurt3	3	103			yurt3	3	103			chem 1	5	28			chem 1	5	28																							chem5	85	50	105
		yurt3	4	5			yurt3	4	5			chem 1	6	565			chem 1	6	565
		yurt3	5	0			yurt3	5	0			cor2	1	0			crumbs1	1	322
		yurt3	1	0			yurt3	1	0			cor2	2	5			crumbs1	2	0																							STAGE chem1 vs yurt3
		yurt3	2	101			yurt3	2	101			cor2	3	24			crumbs1	3	0
		yurt3	3	85			yurt3	3	85			cor2	4	0			crumbs1	4	0																							yurt3	LARVAE	0
		yurt3	4	3			yurt3	4	3			cor2	5	111			crumbs1	5	0																							yurt3	PUPAE	0
		yurt3	5	0			yurt3	5	0			cor2	6	3			crumbs1	6	0																							yurt10	FLY	0
		yurt3	1	4			yurt3	1	4			cor2	1	0			crumbs1	1	385																							yrt3-/-, ch1+/-	LARVAE	203
		yurt3	2	111			yurt3	2	111			cor2	2	6			crumbs1	2	0																							yrt3-/-, ch1+/-	PUPAE	437
		yurt3	3	104			yurt3	3	104			cor2	3	54			crumbs1	3	0																							yrt3-/-, ch1+/-	FLY	0
		yurt3	4	0			yurt3	4	0			cor2	4	0			crumbs1	4	0
		yurt3	5	0			yurt3	5	0			cor2	5	125			crumbs1	5	0
		yurt3	1	1			yurt3	1	1			cor2	6	2			crumbs1	6	0																							STAGE chem1 vs crumbs
		yurt3	2	119			yurt3	2	119			cor2	1	0			crumbs1	1	341
		yurt3	3	116			yurt3	3	116			cor2	2	3			crumbs1	2	0																							HETch1, crb1	LARVAE	7
		yurt3	4	4			yurt3	4	4			cor2	3	80			crumbs1	3	0																							HETch1 ,crb1	PUPAE	5
		yurt3	5	0			yurt3	5	0			cor2	4	0			crumbs1	4	0																							HETch1, crb1	FLY	108
		HOMyurtHETch1	1	1			HOMyurtHETch3	1	4			cor2	5	178			crumbs1	5	0																							HETch1 ,HOMcrb1	LARVAE	8
		HOMyurtHETch1	2	1			HOMyurtHETch3	2	63			cor2	6	2			crumbs1	6	0																							HETch1, HOMcrb1	PUPAE	0
		HOMyurtHETch1	3	2			HOMyurtHETch3	3	27			cor2	1	0			crumbs1	1	229																							HETch1 ,HOMcrb1	FLY	11
		HOMyurtHETch1	4	2			HOMyurtHETch3	4	18			cor2	2	3			crumbs1	2	0																							HOMch1, HETcrb1	LARVAE	5
		HOMyurtHETch1	5	67			HOMyurtHETch3	5	38			cor2	3	102			crumbs1	3	0																							HOMch1, HETcrb1	PUPAE	3
		HOMyurtHETch1	1	4			HOMyurtHETch3	1	15			cor2	4	0			crumbs1	4	0																							HOMch1 ,HETcrb1	FLY	70
		HOMyurtHETch1	2	2			HOMyurtHETch3	2	89			cor2	5	181			crumbs1	5	0																							HOMch1 ,HOMcrb1	LARVAE	72
		HOMyurtHETch1	3	0			HOMyurtHETch3	3	53			cor2	6	2			crumbs1	6	0																							HOMch1 ,HOMcrb1	PUPAE	19
		HOMyurtHETch1	4	1			HOMyurtHETch3	4	11			HOMcor2hetch1	1	0			HOMcrb1HETch1	1	247																							HOMch1 ,HOMcrb1	FLY	27
		HOMyurtHETch1	5	66			HOMyurtHETch3	5	38			HOMcor2hetch1	2	6			HOMcrb1HETch1	2	0
		HOMyurtHETch1	1	3			HOMyurtHETch3	1	9			HOMcor2hetch1	3	130			HOMcrb1HETch1	3	6
		HOMyurtHETch1	2	4			HOMyurtHETch3	2	120			HOMcor2hetch1	4	16			HOMcrb1HETch1	4	0
		HOMyurtHETch1	3	0			HOMyurtHETch3	3	90			HOMcor2hetch1	5	186			HOMcrb1HETch1	5	0
		HOMyurtHETch1	4	0			HOMyurtHETch3	4	11			HOMcor2hetch1	6	16			HOMcrb1HETch1	6	4
		HOMyurtHETch1	5	126			HOMyurtHETch3	5	52			HOMcor2hetch1	1	4			HOMcrb1HETch1	1	404
		HOMyurtHETch1	1	4			HOMyurtHETch3	1	12			HOMcor2hetch1	2	1			HOMcrb1HETch1	2	0
		HOMyurtHETch1	2	3			HOMyurtHETch3	2	126			HOMcor2hetch1	3	101			HOMcrb1HETch1	3	18
		HOMyurtHETch1	3	0			HOMyurtHETch3	3	96			HOMcor2hetch1	4	8			HOMcrb1HETch1	4	2
		HOMyurtHETch1	4	0			HOMyurtHETch3	4	24			HOMcor2hetch1	5	97			HOMcrb1HETch1	5	0
		HOMyurtHETch1	5	284			HOMyurtHETch3	5	64			HOMcor2hetch1	6	7			HOMcrb1HETch1	6	10
		HOMch1HETyurt	1	3			HOMch3HETyurt	1	4			HOMcor2hetch1	1	0			HOMcrb1HETch1	1	365
		HOMch1HETyurt	2	0			HOMch3HETyurt	2	99			HOMcor2hetch1	2	0			HOMcrb1HETch1	2	0
		HOMch1HETyurt	3	2			HOMch3HETyurt	3	46			HOMcor2hetch1	3	125			HOMcrb1HETch1	3	10
		HOMch1HETyurt	4	0			HOMch3HETyurt	4	15			HOMcor2hetch1	4	2			HOMcrb1HETch1	4	0
		HOMch1HETyurt	5	49			HOMch3HETyurt	5	125			HOMcor2hetch1	5	190			HOMcrb1HETch1	5	0
		HOMch1HETyurt	1	5			HOMch3HETyurt	1	6			HOMcor2hetch1	6	11			HOMcrb1HETch1	6	10
		HOMch1HETyurt	2	3			HOMch3HETyurt	2	28			HOMcor2hetch1	1	2			HOMcrb1HETch1	1	277
		HOMch1HETyurt	3	11			HOMch3HETyurt	3	24			HOMcor2hetch1	2	0			HOMcrb1HETch1	2	0
		HOMch1HETyurt	4	1			HOMch3HETyurt	4	8			HOMcor2hetch1	3	95			HOMcrb1HETch1	3	8
		HOMch1HETyurt	5	225			HOMch3HETyurt	5	38			HOMcor2hetch1	4	18			HOMcrb1HETch1	4	3
		HOMch1HETyurt	1	6			HOMch3HETyurt	1	5			HOMcor2hetch1	5	117			HOMcrb1HETch1	5	0
		HOMch1HETyurt	2	5			HOMch3HETyurt	2	37			HOMcor2hetch1	6	10			HOMcrb1HETch1	6	13
		HOMch1HETyurt	3	7			HOMch3HETyurt	3	18			HOMch1HETcor2	1	25			HOMch1HETcrb1	1	7
		HOMch1HETyurt	4	0			HOMch3HETyurt	4	4			HOMch1HETcor2	2	50			HOMch1HETcrb1	2	4
		HOMch1HETyurt	5	67			HOMch3HETyurt	5	40			HOMch1HETcor2	3	18			HOMch1HETcrb1	3	7
		HOMch1HETyurt	1	7			HOMch3HETyurt	1	4			HOMch1HETcor2	4	30			HOMch1HETcrb1	4	21
		HOMch1HETyurt	2	8			HOMch3HETyurt	2	36			HOMch1HETcor2	5	12			HOMch1HETcrb1	5	3
		HOMch1HETyurt	3	14			HOMch3HETyurt	3	28			HOMch1HETcor2	6	31			HOMch1HETcrb1	6	320
		HOMch1HETyurt	4	2			HOMch3HETyurt	4	2			HOMch1HETcor2	1	22			HOMch1HETcrb1	1	2
		HOMch1HETyurt	5	141			HOMch3HETyurt	5	75			HOMch1HETcor2	2	78			HOMch1HETcrb1	2	1
		DMUTch1yurt	1	3			DMUTch3yurt	1	6			HOMch1HETcor2	3	21			HOMch1HETcrb1	3	15
		DMUTch1yurt	2	6			DMUTch3yurt	2	59			HOMch1HETcor2	4	56			HOMch1HETcrb1	4	13
		DMUTch1yurt	3	19			DMUTch3yurt	3	111			HOMch1HETcor2	5	13			HOMch1HETcrb1	5	6
		DMUTch1yurt	4	35			DMUTch3yurt	4	0			HOMch1HETcor2	6	35			HOMch1HETcrb1	6	273
		DMUTch1yurt	5	0			DMUTch3yurt	5	0			HOMch1HETcor2	1	36			HOMch1HETcrb1	1	6
		DMUTch1yurt	1	10			DMUTch3yurt	1	4			HOMch1HETcor2	2	60			HOMch1HETcrb1	2	2
		DMUTch1yurt	2	29			DMUTch3yurt	2	42			HOMch1HETcor2	3	21			HOMch1HETcrb1	3	21
		DMUTch1yurt	3	27			DMUTch3yurt	3	214			HOMch1HETcor2	4	64			HOMch1HETcrb1	4	19
		DMUTch1yurt	4	164			DMUTch3yurt	4	0			HOMch1HETcor2	5	9			HOMch1HETcrb1	5	5
		DMUTch1yurt	5	0			DMUTch3yurt	5	0			HOMch1HETcor2	6	27			HOMch1HETcrb1	6	318
		DMUTch1yurt	1	0			DMUTch3yurt	1	9			HOMch1HETcor2	1	30			HOMch1HETcrb1	1	9
		DMUTch1yurt	2	7			DMUTch3yurt	2	27			HOMch1HETcor2	2	48			HOMch1HETcrb1	2	2
		DMUTch1yurt	3	20			DMUTch3yurt	3	136			HOMch1HETcor2	3	10			HOMch1HETcrb1	3	37
		DMUTch1yurt	4	107			DMUTch3yurt	4	2			HOMch1HETcor2	4	41			HOMch1HETcrb1	4	28
		DMUTch1yurt	5	0			DMUTch3yurt	5	0			HOMch1HETcor2	5	14			HOMch1HETcrb1	5	3
		DMUTch1yurt	1	8			DMUTch3yurt	1	3			HOMch1HETcor2	6	36			HOMch1HETcrb1	6	309
		DMUTch1yurt	2	25			DMUTch3yurt	2	15			DMUTch1cor2	1	0			DMUTch1crb1	1	142
		DMUTch1yurt	3	34			DMUTch3yurt	3	164			DMUTch1cor2	2	81			DMUTch1crb1	2	2
		DMUTch1yurt	4	64			DMUTch3yurt	4	1			DMUTch1cor2	3	179			DMUTch1crb1	3	45
		DMUTch1yurt	5	0			DMUTch3yurt	5	0			DMUTch1cor2	4	72			DMUTch1crb1	4	44
												DMUTch1cor2	5	32			DMUTch1crb1	5	6
												DMUTch1cor2	6	0			DMUTch1crb1	6	162
												DMUTch1cor2	1	0			DMUTch1crb1	1	106
												DMUTch1cor2	2	52			DMUTch1crb1	2	0
												DMUTch1cor2	3	80			DMUTch1crb1	3	45
												DMUTch1cor2	4	33			DMUTch1crb1	4	28
												DMUTch1cor2	5	18			DMUTch1crb1	5	2
												DMUTch1cor2	6	0			DMUTch1crb1	6	133
												DMUTch1cor2	1	0			DMUTch1crb1	1	197
												DMUTch1cor2	2	59			DMUTch1crb1	2	2
												DMUTch1cor2	3	103			DMUTch1crb1	3	73
												DMUTch1cor2	4	44			DMUTch1crb1	4	36
												DMUTch1cor2	5	10			DMUTch1crb1	5	2
												DMUTch1cor2	6	0			DMUTch1crb1	6	193
												DMUTch1cor2	1	0			DMUTch1crb1	1	104
												DMUTch1cor2	2	37			DMUTch1crb1	2	0
												DMUTch1cor2	3	68			DMUTch1crb1	3	55
												DMUTch1cor2	4	21			DMUTch1crb1	4	33
												DMUTch1cor2	5	12			DMUTch1crb1	5	4
												DMUTch1cor2	6	0			DMUTch1crb1	6	127

## Sheet: Datos Fluorescecncia
	Tinción crumbs interacción chem vs yurt						Tinción crumbs mutantes chem						Tinción coracle mutantes chem
	yw	chem 1 +/-	yurt 3	yrt, ch1			yw	chem 1	chem 3	chem 5			yw	chem 1	chem 3	chem 5
	20133.9	19895.1	11982.4	22559.6			20133.9	9314.69	12701.8	8593.57			15178.5	18567.3	21899.2	26481.2
	26119.7	13284.8	10701.9	17434.5			26119.7	7640.81	8942.38	10562.3			14175.4	13957.6	25056.7	24517.5
	20097.2	17449.9	8640.19	16855.7			20097.2	10686.1	12762.6	7875.26			17194.9	21393.5	16786.3	26819.1
	14718.7	12568.4	12756	26761.9			14718.7	11230.9	11390.2	8069.99			12982.7	19120.3	16530.2	21669.1
	20718.3	15335.2	8089.08	21927.2			20718.3	12355.6	11488.7	3345.26			13249.3	14507.3	15535.3	19350.5
	19070.2	11148.4	7786.69	25885			19070.2	17212.1	19122.4					17527.8	23545.3	24839.9
	24811.5	18925.2	5626.43	20520.1			24811.5		15894.1					24425.4	10440.5	24021.1
		16144.8	9744.91											24415.8	19387.4	19800
Mean	20810	15590	9416	21710		Mean	20810	11410	13190	7689		Mean	14560	19240	18650	23440
Std. Deviation	3771	3109	2357	3807		Std. Deviation	3771	3278	3344	2652		Std. Deviation	1709	4000	4798	2859
Std. Error	1425	1099	833.3	1439		Std. Error	1425	1338	1264	1186		Std. Error	764.2	1414	1697	1011
	Tinción armadillo mutantes chem						Tinción armadillo en anmioserosa de mutantes chem						Longitud membrana baso-lateral de celulas de la
													epidermis lateral de mutantes chem ( St 12)
	yw	chem 1	chem 3	chem 5			yw	chem 1	chem 3	chem 5
	13021.3	4934.66	10527.7	12161.2			13840.2	5655.27	4939.34	2823.2			yw	chem 1	chem 3	chem 5
	10695.2	8671.59	6462.18	5692.85			13982.1	4353.98	9051.44	3504.27			7.968	5.065	8.689	7.72
	15976	4567.52	4826.38	10013			10118.2	11473	868.2	5752.57			9.645	5.188	5.993	5.824
	12366.5	4796.83	8088.53	7271.52			9556.66	6378.98	3870.19	4143.94			9.628	3.37	5.6	4.578
	16183.3	5733.69	8274.57	8847.52			14818.9	6437.37	3542.13	3483.37			9.237	3.682	4.999	4.166
	14545.4	4732.69	6298.77	9351.68			14524.7	13302.9	7826.77	601.21			8.269	3.532	4.696	3.878
	14792.4	3707.8	5984.78	12019.6			11972.7	5223.47	2746.3	10031.5			7.486	3.169	7.608	4.081
		6373.73	8268.46	9380.46			17144.2	13888.9	16484.4	7437.72			7.604	3.833	8.956	4.468
Mean	13940	5440	7341	9342			14225	12729.2	8771.11	6394.3			7.351	3.942	7.345	4.461
Std. Deviation	2005	1527	1792	2185			23149.8	16173.9		4870.3			9.081	4.38	8.436	5.416
Std. Error	757.8	540	633.4	772.5			12870.1	10342.8		15721.4			8.372	5.131	5.659	5.865
							7048.25	16013		11601			7.197	4.545	4.935	6.109
							16882.4	11967.6		16388.3			7.255	3.922	4.192	5.955
								18068.2		12373.7			4.731	3.652	4.092	4.457
								15071.6					6.833	5.121	6.556	3.725
						Mean	13860	11140	6456	7509			6.598	3.189	6.534	4.07
						Std. Deviation	3992	4509	4704	4943			8.184	3.356	6.727	4.381
						Std. Error	1107	1164	1568	1321			8.421	4.696	6.325	4.138
													8.459	3.67	6.101	2.249
													5.416	3.561	6.3	3.423
													5.133	4.43	7.827	4.075
													6.064	4.369	6.835	4.662
													5.793	3.703	6.173	4.473
													6.237	3.942	9.29	5.433
													7.39	4.117	10.106	5.479
													7.484	3.699	8.203	6.431
													7.497	3.618	9.187	5.189
													6.97	6.669	7.069	5.008
													6.512	9.558	5.146	6.849
													6.102	7.199	8.388	5.729
													5.8	7.161	8.43	6.176
													7.14	7.408	6.772	4.052
													8.201	8.247	4.969	2.713
													7.711	9.38	7.175	4.489
													9.42	8.875	6.592	3.784
													8.13	8.162	8.318	4.362
													6.501	8.116	10.747	6.158
													7.408	7.444	11.194	10.015
													6.696	5.802	6.981	8.76
													7.181	5.745	11.015	7.566
													7.403	7.946	8.775	6.055
													1.402	7.879	7.773	9.681
													2.378	8.152	6.883	9.912
													6.008	6.474	4.456	5.282
													6.174	4.514	8.022	7.427
													6.151	4.851	7.458	6.786
													8.17	6.436	5.625	6.289
													6.494	6.809	5.344	4.424
													6.306	8.749	6.002	5.756
													5.029	9.386	9.267	6.6
													4.697	6.852	9.963	7.886
													6.106	5.711	6.995	6.606
													5.388	4.81	6.198	5.669
													6.221	4.708	9.686	4.741
													5.977	7.9	8.056	4.166
													5.909	7.081	8.369	5.459
													7.476	8.812	6.531	6.73
													7.57	9.218	6.373	6.568
													6.913	9.535	6.688	7.106
													6.607	7.181	8.665	7.807
													7.588	8.562	8.937	6.458
													5.707	9.874	7.027	4.89
													7.196	4.802	3.967	5.561
													6.853	8.056	4.095	5.788
													7.531	6.165	10.562	6.21
													7.412	6.775	7.666	7.971
													5.407	7.317	5.673	6.174
													4.681	6.345	7.52	6.643
													6.535	6.935	5.896	5.207
													6.799	7.977	8.819	5.26
													5.447	6.699	8.123	5.537
													4.838	7.561	8.903	4.84
													4.971	6.491	8.468	4.569
													6.841	6.285	8.298	4.597
													6.825	6.557	8.99	4.748
													5.075	7.389	7.645	6.008
													4.928	7.126	9.306	5.818
													4.648	7.914	4.92	5.423
													3.689	6.608	3.789	4.96
													6.34	5.083	6.079	5.223
													7.431	7.502	5.522	3.466
													7.22	7.336	4.213	5.888
													4.7	7.169	3.833	4.841
													5.885	6.754	4.522	4.369
													4.977	5.736	4.462	5.054
													7.892	8.569	4.586	5.493
													5.14	7.482	4.2	5.746
													4.96	6.376	5.429	6.213
													5.387	5.628	4.762	6.415
													5.387	6.435	5.833	4.271
													4.099	6.838	6.217	4.158
													8.067	7.459	4.33	4.214
													8.611	8.213	4.163	4.626
													5.41	9.191	4.692	5.152
													5.297	7.388	4.637	4.898
													8.697	6.426	3.834	7.288
													6.876	7.342	5.478	5.548
													6.622	5.285	6.437	4.737
													2.923	7.98	4.899	4.415
													3.326	7.711	4.319	4.75
													6.531	6.618	4.043	4.987
													7.471	6.305	3.971	4.74
													7.827	6.26	5.466	5.752
													4.857	6.303	5.928	4.515
													5.716	7.38	5.993	5.502
													5.652	6.295	7.298	5.664
													6.164	8.375	6.056	3.795
													6.624	6.238	6.53	6.158
													4.651	3.284	5.269	6.806
													6.387	2.641	5.376	6.633
													7.486	4.832	5.498	6.127
													4.379	7.341	6.246	6.459
													6.501	7.285	6.888	5.355
													6.435	8.261	6.828	4.764
													6.507	7.144	6.782	5.728
													2.642	5.832	5.411	3.35
													3.28	4.827	6.19	5.894
													4.685	5.609	7.684	5.837
													6.236	4.954	6.339	5.664
													6.04	5.144	6.135	5.4
													5.957	8.521	7.07	5.38
													6.819	7.939	7.244	6.038
													6.611	3.739	7.925	5.612
													6.633	3.443	6.631	5.065
													5.934	4.272	7.647	5.701
													7.037	4.794	7.005	5.887
													6.026	7.112	6.693	6.628
													6.68	4.152	7.071	4.555
													6.504	10.572	9.384	4.259
													6.84	10.385	6.988	4.82
													5.655	8.584	10.485	6.526
													5.903	2.959	7.857	7.183
													5.355	2.852	7.825	5.641
													2.568	7.438		4.177
													2.497	8.836		5.322
													5.192	8.464		5.475
													6.5	6.975		6.787
													5.479	7.968		5.79
													6.169	7.87		5.157
													6.597	6.632		5.264
													6.703	7.142		8.258
													7.002	8.759		4.343
													6.649	7.641		4.095
													5.048	8.626		2.582
													3.813	6.331		2.635
													4.841	5.441		2.87
													6.48	8.622		6.931
													6.261	7.975		8.03
													5.119	9.089
													6.58	8.681
													4.95
													5.894
													4.863
													5.654
													4.723
													4.561
													4.871
													3.915
													4.746
													4.182
													4.514
													6.263
													6.309
													6.158
													5.52
													4.911
													4.772
													3.784
													4.186
													5.465
													6.922
													6.595
													4.194
													4.696
													5.5
													5.389
													5.17
												Mean	6.102	6.468	6.728	5.475
												Std. Deviation	1.453	1.853	1.757	1.351
												Std. Error	0.1095	0.1518	0.1529	0.1114
												n	176	149	132	147
